# Supplementary material for: Exploring the Relationships Between Obesity, Cholesterol, and Hypertension: a Cross-Sectional Study in Indonesia
Source: Research Square preprint supplement (doi:10.21203/rs.3.rs-7854297/v1), 2025-11-25
Supplement: Supplementary file 1 [file 56cfaef38b34991fc40bc10c.xlsx]

## Sheet: Univariat
KARAKTERISTIK RESPONDEN
Umur							kat_umur
		Frequency	Percent	Valid Percent	Cumulative Percent				Frequency	Percent	Valid Percent	Cumulative Percent
Valid	12	1	0.350877	0.350877	0.350877		Valid	< = 35 tahun	62	21.7544	21.7544	21.7544
	14	1	0.350877	0.350877	0.701754			36-60 tahun	187	65.614	65.614	87.3684
	17	1	0.350877	0.350877	1.05263			> 60 tahun	36	12.6316	12.6316	100
	21	4	1.40351	1.40351	2.45614			Total	285	100	100
	22	1	0.350877	0.350877	2.80702
	23	3	1.05263	1.05263	3.85965
	24	2	0.701754	0.701754	4.5614		JK
	25	6	2.10526	2.10526	6.66667				Frequency	Percent	Valid Percent	Cumulative Percent
	26	4	1.40351	1.40351	8.07018		Valid	Laki-laki	83	29.1228	29.1228	29.1228
	27	6	2.10526	2.10526	10.1754			Perempuan	202	70.8772	70.8772	100
	28	4	1.40351	1.40351	11.5789			Total	285	100	100
	30	6	2.10526	2.10526	13.6842
	31	1	0.350877	0.350877	14.0351
	32	9	3.15789	3.15789	17.193
	33	2	0.701754	0.701754	17.8947
	34	4	1.40351	1.40351	19.2982
	35	7	2.45614	2.45614	21.7544
	36	7	2.45614	2.45614	24.2105
	37	2	0.701754	0.701754	24.9123
	38	7	2.45614	2.45614	27.3684
	39	4	1.40351	1.40351	28.7719
	40	10	3.50877	3.50877	32.2807
	41	3	1.05263	1.05263	33.3333
	42	5	1.75439	1.75439	35.0877
	43	7	2.45614	2.45614	37.5439
	44	7	2.45614	2.45614	40
	45	11	3.85965	3.85965	43.8596
	46	8	2.80702	2.80702	46.6667
	47	6	2.10526	2.10526	48.7719
	48	6	2.10526	2.10526	50.8772
	49	5	1.75439	1.75439	52.6316
	50	18	6.31579	6.31579	58.9474
	51	7	2.45614	2.45614	61.4035
	52	7	2.45614	2.45614	63.8596
	53	6	2.10526	2.10526	65.9649
	54	8	2.80702	2.80702	68.7719
	55	14	4.91228	4.91228	73.6842
	56	7	2.45614	2.45614	76.1404
	57	7	2.45614	2.45614	78.5965
	58	6	2.10526	2.10526	80.7018
	59	3	1.05263	1.05263	81.7544
	60	16	5.61404	5.61404	87.3684
	61	4	1.40351	1.40351	88.7719
	62	5	1.75439	1.75439	90.5263
	63	4	1.40351	1.40351	91.9298
	64	4	1.40351	1.40351	93.3333
	65	5	1.75439	1.75439	95.0877
	69	2	0.701754	0.701754	95.7895
	70	5	1.75439	1.75439	97.5439
	74	1	0.350877	0.350877	97.8947
	75	1	0.350877	0.350877	98.2456
	76	1	0.350877	0.350877	98.5965
	77	1	0.350877	0.350877	98.9474
	78	1	0.350877	0.350877	99.2982
	86	1	0.350877	0.350877	99.6491
	110	1	0.350877	0.350877	100
	Total	285	100	100
NUMERIK
BMI								Kolestrol								Sistol
		Frequency	Percent	Valid Percent	Cumulative Percent					Frequency	Percent	Valid Percent	Cumulative Percent					Frequency	Percent	Valid Percent	Cumulative Percent		Descriptive Statistics
Valid	25.0	4	1.40351	1.40351	1.40351			Valid	105	1	0.350877	0.350877	0.350877			Valid	87	1	0.350877	0.350877	0.350877			N	Minimum	Maximum	Mean	Std. Deviation
	25.1	4	1.40351	1.40351	2.80702				110	1	0.350877	0.350877	0.701754				91	1	0.350877	0.350877	0.701754		BMI	285	25	48.6	28.8479	3.77708
	25.2	10	3.50877	3.50877	6.31579				116	1	0.350877	0.350877	1.05263				97	1	0.350877	0.350877	1.05263		Kolestrol	285	105	386	210.698	51.7152
	25.3	5	1.75439	1.75439	8.07018				123	1	0.350877	0.350877	1.40351				98	1	0.350877	0.350877	1.40351		Sistol	285	87	205	140.326	23.801
	25.4	4	1.40351	1.40351	9.47368				124	2	0.701754	0.701754	2.10526				99	2	0.701754	0.701754	2.10526		Valid N (listwise)	285
	25.5	2	0.701754	0.701754	10.1754				126	2	0.701754	0.701754	2.80702				100	1	0.350877	0.350877	2.45614
	25.6	1	0.350877	0.350877	10.5263				128	1	0.350877	0.350877	3.15789				102	2	0.701754	0.701754	3.15789
	25.6	4	1.40351	1.40351	11.9298				129	2	0.701754	0.701754	3.85965				103	1	0.350877	0.350877	3.50877
	25.7	1	0.350877	0.350877	12.2807				130	1	0.350877	0.350877	4.21053				106	1	0.350877	0.350877	3.85965
	25.7	3	1.05263	1.05263	13.3333				134	1	0.350877	0.350877	4.5614				108	5	1.75439	1.75439	5.61404
	25.8	9	3.15789	3.15789	16.4912				135	2	0.701754	0.701754	5.26316				109	1	0.350877	0.350877	5.96491
	25.9	8	2.80702	2.80702	19.2982				136	1	0.350877	0.350877	5.61404				110	4	1.40351	1.40351	7.36842
	26.0	7	2.45614	2.45614	21.7544				137	1	0.350877	0.350877	5.96491				111	5	1.75439	1.75439	9.12281
	26.1	7	2.45614	2.45614	24.2105				138	1	0.350877	0.350877	6.31579				112	7	2.45614	2.45614	11.5789
	26.2	1	0.350877	0.350877	24.5614				140	2	0.701754	0.701754	7.01754				113	1	0.350877	0.350877	11.9298
	26.2	4	1.40351	1.40351	25.9649				141	3	1.05263	1.05263	8.07018				114	3	1.05263	1.05263	12.9825
	26.3	2	0.701754	0.701754	26.6667				143	1	0.350877	0.350877	8.42105				115	4	1.40351	1.40351	14.386
	26.4	3	1.05263	1.05263	27.7193				145	2	0.701754	0.701754	9.12281				116	6	2.10526	2.10526	16.4912
	26.5	1	0.350877	0.350877	28.0702				146	1	0.350877	0.350877	9.47368				117	1	0.350877	0.350877	16.8421
	26.5	2	0.701754	0.701754	28.7719				148	1	0.350877	0.350877	9.82456				118	3	1.05263	1.05263	17.8947
	26.6	6	2.10526	2.10526	30.8772				149	3	1.05263	1.05263	10.8772				119	3	1.05263	1.05263	18.9474
	26.7	2	0.701754	0.701754	31.5789				150	1	0.350877	0.350877	11.2281				120	8	2.80702	2.80702	21.7544
	26.8	3	1.05263	1.05263	32.6316				151	3	1.05263	1.05263	12.2807				121	3	1.05263	1.05263	22.807
	26.9	4	1.40351	1.40351	34.0351				152	1	0.350877	0.350877	12.6316				122	6	2.10526	2.10526	24.9123
	26.9	1	0.350877	0.350877	34.386				154	2	0.701754	0.701754	13.3333				123	2	0.701754	0.701754	25.614
	26.9	1	0.350877	0.350877	34.7368				155	1	0.350877	0.350877	13.6842				124	6	2.10526	2.10526	27.7193
	27.0	7	2.45614	2.45614	37.193				156	1	0.350877	0.350877	14.0351				125	6	2.10526	2.10526	29.8246
	27.1	6	2.10526	2.10526	39.2982				158	1	0.350877	0.350877	14.386				126	4	1.40351	1.40351	31.2281
	27.2	2	0.701754	0.701754	40				159	1	0.350877	0.350877	14.7368				127	4	1.40351	1.40351	32.6316
	27.3	6	2.10526	2.10526	42.1053				160	3	1.05263	1.05263	15.7895				128	6	2.10526	2.10526	34.7368
	27.4	1	0.350877	0.350877	42.4561				162	3	1.05263	1.05263	16.8421				129	5	1.75439	1.75439	36.4912
	27.4	3	1.05263	1.05263	43.5088				164	2	0.701754	0.701754	17.5439				130	7	2.45614	2.45614	38.9474
	27.5	4	1.40351	1.40351	44.9123				165	1	0.350877	0.350877	17.8947				131	7	2.45614	2.45614	41.4035
	27.6	1	0.350877	0.350877	45.2632				166	2	0.701754	0.701754	18.5965				132	3	1.05263	1.05263	42.4561
	27.6	3	1.05263	1.05263	46.3158				167	3	1.05263	1.05263	19.6491				133	5	1.75439	1.75439	44.2105
	27.7	1	0.350877	0.350877	46.6667				168	5	1.75439	1.75439	21.4035				134	4	1.40351	1.40351	45.614
	27.7	8	2.80702	2.80702	49.4737				169	2	0.701754	0.701754	22.1053				135	4	1.40351	1.40351	47.0175
	27.8	4	1.40351	1.40351	50.8772				171	4	1.40351	1.40351	23.5088				136	6	2.10526	2.10526	49.1228
	27.9	3	1.05263	1.05263	51.9298				172	2	0.701754	0.701754	24.2105				137	5	1.75439	1.75439	50.8772
	28.0	4	1.40351	1.40351	53.3333				173	3	1.05263	1.05263	25.2632				138	5	1.75439	1.75439	52.6316
	28.1	3	1.05263	1.05263	54.386				174	2	0.701754	0.701754	25.9649				139	3	1.05263	1.05263	53.6842
	28.2	4	1.40351	1.40351	55.7895				175	2	0.701754	0.701754	26.6667				140	6	2.10526	2.10526	55.7895
	28.3	1	0.350877	0.350877	56.1404				176	2	0.701754	0.701754	27.3684				141	5	1.75439	1.75439	57.5439
	28.3	3	1.05263	1.05263	57.193				177	6	2.10526	2.10526	29.4737				142	8	2.80702	2.80702	60.3509
	28.4	4	1.40351	1.40351	58.5965				178	4	1.40351	1.40351	30.8772				143	5	1.75439	1.75439	62.1053
	28.5	1	0.350877	0.350877	58.9474				179	6	2.10526	2.10526	32.9825				144	2	0.701754	0.701754	62.807
	28.6	3	1.05263	1.05263	60				180	3	1.05263	1.05263	34.0351				145	6	2.10526	2.10526	64.9123
	28.7	4	1.40351	1.40351	61.4035				181	6	2.10526	2.10526	36.1404				146	1	0.350877	0.350877	65.2632
	28.8	4	1.40351	1.40351	62.807				183	1	0.350877	0.350877	36.4912				147	3	1.05263	1.05263	66.3158
	28.9	2	0.701754	0.701754	63.5088				184	1	0.350877	0.350877	36.8421				148	3	1.05263	1.05263	67.3684
	28.9	1	0.350877	0.350877	63.8596				185	2	0.701754	0.701754	37.5439				149	4	1.40351	1.40351	68.7719
	29.0	1	0.350877	0.350877	64.2105				186	4	1.40351	1.40351	38.9474				150	5	1.75439	1.75439	70.5263
	29.0	1	0.350877	0.350877	64.5614				187	2	0.701754	0.701754	39.6491				151	4	1.40351	1.40351	71.9298
	29.1	4	1.40351	1.40351	65.9649				190	1	0.350877	0.350877	40				152	1	0.350877	0.350877	72.2807
	29.2	5	1.75439	1.75439	67.7193				191	1	0.350877	0.350877	40.3509				153	7	2.45614	2.45614	74.7368
	29.3	7	2.45614	2.45614	70.1754				192	2	0.701754	0.701754	41.0526				154	1	0.350877	0.350877	75.0877
	29.4	2	0.701754	0.701754	70.8772				193	2	0.701754	0.701754	41.7544				155	2	0.701754	0.701754	75.7895
	29.5	1	0.350877	0.350877	71.2281				194	3	1.05263	1.05263	42.807				157	2	0.701754	0.701754	76.4912
	29.5	1	0.350877	0.350877	71.5789				195	3	1.05263	1.05263	43.8596				158	2	0.701754	0.701754	77.193
	29.5	4	1.40351	1.40351	72.9825				196	1	0.350877	0.350877	44.2105				159	2	0.701754	0.701754	77.8947
	29.6	1	0.350877	0.350877	73.3333				197	3	1.05263	1.05263	45.2632				160	6	2.10526	2.10526	80
	29.8	1	0.350877	0.350877	73.6842				198	6	2.10526	2.10526	47.3684				161	1	0.350877	0.350877	80.3509
	29.9	4	1.40351	1.40351	75.0877				199	4	1.40351	1.40351	48.7719				163	1	0.350877	0.350877	80.7018
	30.0	6	2.10526	2.10526	77.193				200	2	0.701754	0.701754	49.4737				164	1	0.350877	0.350877	81.0526
	30.1	2	0.701754	0.701754	77.8947				201	2	0.701754	0.701754	50.1754				165	3	1.05263	1.05263	82.1053
	30.2	1	0.350877	0.350877	78.2456				202	2	0.701754	0.701754	50.8772				166	1	0.350877	0.350877	82.4561
	30.3	1	0.350877	0.350877	78.5965				203	1	0.350877	0.350877	51.2281				167	1	0.350877	0.350877	82.807
	30.4	1	0.350877	0.350877	78.9474				204	2	0.701754	0.701754	51.9298				168	2	0.701754	0.701754	83.5088
	30.8	2	0.701754	0.701754	79.6491				205	1	0.350877	0.350877	52.2807				169	3	1.05263	1.05263	84.5614
	30.9	2	0.701754	0.701754	80.3509				206	2	0.701754	0.701754	52.9825				170	2	0.701754	0.701754	85.2632
	31.0	2	0.701754	0.701754	81.0526				207	3	1.05263	1.05263	54.0351				171	5	1.75439	1.75439	87.0175
	31.1	4	1.40351	1.40351	82.4561				209	3	1.05263	1.05263	55.0877				172	5	1.75439	1.75439	88.7719
	31.2	2	0.701754	0.701754	83.1579				210	2	0.701754	0.701754	55.7895				173	4	1.40351	1.40351	90.1754
	31.3	1	0.350877	0.350877	83.5088				212	3	1.05263	1.05263	56.8421				174	2	0.701754	0.701754	90.8772
	31.4	1	0.350877	0.350877	83.8596				213	1	0.350877	0.350877	57.193				175	4	1.40351	1.40351	92.2807
	31.5	3	1.05263	1.05263	84.9123				214	3	1.05263	1.05263	58.2456				176	2	0.701754	0.701754	92.9825
	31.7	1	0.350877	0.350877	85.2632				216	1	0.350877	0.350877	58.5965				178	1	0.350877	0.350877	93.3333
	31.7	2	0.701754	0.701754	85.9649				217	2	0.701754	0.701754	59.2982				180	2	0.701754	0.701754	94.0351
	31.8	2	0.701754	0.701754	86.6667				218	2	0.701754	0.701754	60				183	1	0.350877	0.350877	94.386
	32.2	1	0.350877	0.350877	87.0175				219	3	1.05263	1.05263	61.0526				185	1	0.350877	0.350877	94.7368
	32.3	1	0.350877	0.350877	87.3684				221	2	0.701754	0.701754	61.7544				187	3	1.05263	1.05263	95.7895
	32.5	1	0.350877	0.350877	87.7193				222	2	0.701754	0.701754	62.4561				189	1	0.350877	0.350877	96.1404
	32.6	2	0.701754	0.701754	88.4211				223	3	1.05263	1.05263	63.5088				190	1	0.350877	0.350877	96.4912
	32.7	2	0.701754	0.701754	89.1228				224	1	0.350877	0.350877	63.8596				191	1	0.350877	0.350877	96.8421
	32.8	2	0.701754	0.701754	89.8246				225	2	0.701754	0.701754	64.5614				193	2	0.701754	0.701754	97.5439
	33.1	2	0.701754	0.701754	90.5263				226	1	0.350877	0.350877	64.9123				194	1	0.350877	0.350877	97.8947
	33.3	1	0.350877	0.350877	90.8772				227	1	0.350877	0.350877	65.2632				195	1	0.350877	0.350877	98.2456
	33.6	1	0.350877	0.350877	91.2281				231	1	0.350877	0.350877	65.614				196	1	0.350877	0.350877	98.5965
	33.9	1	0.350877	0.350877	91.5789				232	1	0.350877	0.350877	65.9649				197	1	0.350877	0.350877	98.9474
	34.0	1	0.350877	0.350877	91.9298				233	1	0.350877	0.350877	66.3158				199	1	0.350877	0.350877	99.2982
	34.3	1	0.350877	0.350877	92.2807				234	1	0.350877	0.350877	66.6667				205	2	0.701754	0.701754	100
	35.1	1	0.350877	0.350877	92.6316				235	1	0.350877	0.350877	67.0175				Total	285	100	100
	35.1	1	0.350877	0.350877	92.9825				236	2	0.701754	0.701754	67.7193
	35.6	1	0.350877	0.350877	93.3333				237	1	0.350877	0.350877	68.0702
	35.6	1	0.350877	0.350877	93.6842				238	3	1.05263	1.05263	69.1228
	36.2	1	0.350877	0.350877	94.0351				240	2	0.701754	0.701754	69.8246
	36.4	1	0.350877	0.350877	94.386				241	4	1.40351	1.40351	71.2281
	36.7	1	0.350877	0.350877	94.7368				242	2	0.701754	0.701754	71.9298
	36.9	1	0.350877	0.350877	95.0877				243	4	1.40351	1.40351	73.3333
	37.1	1	0.350877	0.350877	95.4386				246	4	1.40351	1.40351	74.7368
	37.2	1	0.350877	0.350877	95.7895				247	1	0.350877	0.350877	75.0877
	37.3	1	0.350877	0.350877	96.1404				248	1	0.350877	0.350877	75.4386
	37.6	1	0.350877	0.350877	96.4912				249	1	0.350877	0.350877	75.7895
	39.4	1	0.350877	0.350877	96.8421				250	3	1.05263	1.05263	76.8421
	39.7	1	0.350877	0.350877	97.193				252	2	0.701754	0.701754	77.5439
	39.9	2	0.701754	0.701754	97.8947				253	2	0.701754	0.701754	78.2456
	40.0	1	0.350877	0.350877	98.2456				254	2	0.701754	0.701754	78.9474
	40.5	1	0.350877	0.350877	98.5965				255	4	1.40351	1.40351	80.3509
	43.1	1	0.350877	0.350877	98.9474				256	2	0.701754	0.701754	81.0526
	44.4	1	0.350877	0.350877	99.2982				258	1	0.350877	0.350877	81.4035
	47.2	1	0.350877	0.350877	99.6491				259	1	0.350877	0.350877	81.7544
	48.6	1	0.350877	0.350877	100				260	1	0.350877	0.350877	82.1053
	Total	285	100	100					262	2	0.701754	0.701754	82.807
									263	2	0.701754	0.701754	83.5088
									266	2	0.701754	0.701754	84.2105
									267	1	0.350877	0.350877	84.5614
									268	1	0.350877	0.350877	84.9123
									269	3	1.05263	1.05263	85.9649
									270	1	0.350877	0.350877	86.3158
									272	2	0.701754	0.701754	87.0175
									275	1	0.350877	0.350877	87.3684
									276	1	0.350877	0.350877	87.7193
									277	1	0.350877	0.350877	88.0702
									278	2	0.701754	0.701754	88.7719
									279	1	0.350877	0.350877	89.1228
									281	1	0.350877	0.350877	89.4737
									283	1	0.350877	0.350877	89.8246
									284	1	0.350877	0.350877	90.1754
									285	3	1.05263	1.05263	91.2281
									286	2	0.701754	0.701754	91.9298
									287	1	0.350877	0.350877	92.2807
									294	1	0.350877	0.350877	92.6316
									296	1	0.350877	0.350877	92.9825
									298	1	0.350877	0.350877	93.3333
									300	1	0.350877	0.350877	93.6842
									301	1	0.350877	0.350877	94.0351
									303	2	0.701754	0.701754	94.7368
									304	2	0.701754	0.701754	95.4386
									306	2	0.701754	0.701754	96.1404
									308	1	0.350877	0.350877	96.4912
									309	1	0.350877	0.350877	96.8421
									310	1	0.350877	0.350877	97.193
									315	1	0.350877	0.350877	97.5439
									318	2	0.701754	0.701754	98.2456
									328	1	0.350877	0.350877	98.5965
									335	1	0.350877	0.350877	98.9474
									340	1	0.350877	0.350877	99.2982
									355	1	0.350877	0.350877	99.6491
									386	1	0.350877	0.350877	100
									Total	285	100	100
KATEGORIKAL
kat_bmibaru
		Frequency	Percent	Valid Percent	Cumulative Percent
Valid	Obesitas	71	24.9123	24.9123	24.9123
	Overweight	214	75.0877	75.0877	100
	Total	285	100	100
kat_kolesterolbaru
		Frequency	Percent	Valid Percent	Cumulative Percent
Valid	Hiperkolestrol	144	50.5263	50.5263	50.5263
	Normokolestrol	141	49.4737	49.4737	100
	Total	285	100	100
kat_hipertensibaru
		Frequency	Percent	Valid Percent	Cumulative Percent
Valid	Hipertensi	132	46.3158	46.3158	46.3158
	Tidak Hipertensi	153	53.6842	53.6842	100
	Total	285	100	100

## Sheet: Bivariat
VARIABEL KATEGORIKAL
kat_bmibaru * kat_kolesterolbaru Crosstabulation								kat_bmibaru * kat_hipertensibaru Crosstabulation								kat_kolesterolbaru * kat_hipertensibaru Crosstabulation
			kat_kolesterolbaru		Total						kat_hipertensibaru		Total						kat_hipertensibaru		Total
			Hiperkolestrol	Normokolestrol							Hipertensi	Tidak Hipertensi							Hipertensi	Tidak Hipertensi
kat_bmibaru	Obesitas	Count	35	36	71			kat_bmibaru	Obesitas	Count	27	44	71			kat_kolesterolbaru	Hiperkolestrol	Count	80	64	144
		% within kat_bmibaru	0.492958	0.507042	1					% within kat_bmibaru	0.380282	0.619718	1					% within kat_kolesterolbaru	0.555556	0.444444	1
	Overweight	Count	109	105	214				Overweight	Count	105	109	214				Normokolestrol	Count	52	89	141
		% within kat_bmibaru	0.509346	0.490654	1					% within kat_bmibaru	0.490654	0.509346	1					% within kat_kolesterolbaru	0.368794	0.631206	1
Total		Count	144	141	285			Total		Count	132	153	285			Total		Count	132	153	285
		% within kat_bmibaru	0.505263	0.494737	1					% within kat_bmibaru	0.463158	0.536842	1					% within kat_kolesterolbaru	0.463158	0.536842	1
Chi-Square Tests								Chi-Square Tests								Chi-Square Tests
	Value	df	Asymptotic Significance (2-sided)	Exact Sig. (2-sided)	Exact Sig. (1-sided)				Value	df	Asymptotic Significance (2-sided)	Exact Sig. (2-sided)	Exact Sig. (1-sided)				Value	df	Asymptotic Significance (2-sided)	Exact Sig. (2-sided)	Exact Sig. (1-sided)
Pearson Chi-Square	.057a	1	0.810851					Pearson Chi-Square	2.612a	1	0.106058					Pearson Chi-Square	9.994a	1	0.00157061
Continuity Correctionb	0.0104783	1	0.918468					Continuity Correctionb	2.18696	1	0.139184					Continuity Correctionb	9.25688	1	0.00234612
Likelihood Ratio	0.0572762	1	0.810854					Likelihood Ratio	2.63623	1	0.104451					Likelihood Ratio	10.0565	1	0.0015181
Fisher's Exact Test				0.891195	0.459167			Fisher's Exact Test				0.13075	0.069159			Fisher's Exact Test				0.00197861	0.00114285
Linear-by-Linear Association	0.0570773	1	0.811177					Linear-by-Linear Association	2.60284	1	0.106673					Linear-by-Linear Association	9.95882	1	0.0016008
N of Valid Cases	285							N of Valid Cases	285							N of Valid Cases	285
a. 0 cells (0.0%) have expected count less than 5. The minimum expected count is 35.13.								a. 0 cells (0.0%) have expected count less than 5. The minimum expected count is 32.88.								a. 0 cells (0.0%) have expected count less than 5. The minimum expected count is 65.31.
b. Computed only for a 2x2 table								b. Computed only for a 2x2 table								b. Computed only for a 2x2 table
Jenis Kelamin x Variabel Kategorik
JK * kat_bmibaru Crosstabulation								JK * kat_kolesterolbaru Crosstabulation								JK * kat_hipertensibaru Crosstabulation
			kat_bmibaru		Total						kat_kolesterolbaru		Total						kat_hipertensibaru		Total
			Obesitas	Overweight							Hiperkolestrol	Normokolestrol							Hipertensi	Tidak Hipertensi
JK	Laki-laki	Count	14	69	83			JK	Laki-laki	Count	22	61	83			JK	Laki-laki	Count	42	41	83
		% within JK	0.168675	0.831325	1					% within JK	0.26506	0.73494	1					% within JK	0.506024	0.493976	1
	Perempuan	Count	57	145	202				Perempuan	Count	122	80	202				Perempuan	Count	90	112	202
		% within JK	0.282178	0.717822	1					% within JK	0.60396	0.39604	1					% within JK	0.445545	0.554455	1
Total		Count	71	214	285			Total		Count	144	141	285			Total		Count	132	153	285
		% within JK	0.249123	0.750877	1					% within JK	0.505263	0.494737	1					% within JK	0.463158	0.536842	1
Chi-Square Tests								Chi-Square Tests								Chi-Square Tests
	Value	df	Asymptotic Significance (2-sided)	Exact Sig. (2-sided)	Exact Sig. (1-sided)				Value	df	Asymptotic Significance (2-sided)	Exact Sig. (2-sided)	Exact Sig. (1-sided)				Value	df	Asymptotic Significance (2-sided)	Exact Sig. (2-sided)	Exact Sig. (1-sided)
Pearson Chi-Square	4.052a	1	0.0441309					Pearson Chi-Square	27.029a	1	2.00385e-07					Pearson Chi-Square	.865a	1	0.352227
Continuity Correctionb	3.46749	1	0.0625862					Continuity Correctionb	25.6906	1	4.00766e-07					Continuity Correctionb	0.639271	1	0.423975
Likelihood Ratio	4.2738	1	0.0387043					Likelihood Ratio	27.8325	1	1.32285e-07					Likelihood Ratio	0.864076	1	0.352601
Fisher's Exact Test				0.0502303	0.029052			Fisher's Exact Test				2.49782e-07	1.40026e-07			Fisher's Exact Test				0.363202	0.211893
Linear-by-Linear Association	4.03733	1	0.0445042					Linear-by-Linear Association	26.9346	1	2.10463e-07					Linear-by-Linear Association	0.862381	1	0.353073
N of Valid Cases	285							N of Valid Cases	285							N of Valid Cases	285
a. 0 cells (0.0%) have expected count less than 5. The minimum expected count is 20.68.								a. 0 cells (0.0%) have expected count less than 5. The minimum expected count is 41.06.								a. 0 cells (0.0%) have expected count less than 5. The minimum expected count is 38.44.
b. Computed only for a 2x2 table								b. Computed only for a 2x2 table								b. Computed only for a 2x2 table
UMUR x Variabel Kategorik
kat_umur * kat_bmibaru Crosstabulation								kat_umur * kat_kolesterolbaru Crosstabulation								kat_umur * kat_hipertensibaru Crosstabulation
			kat_bmibaru		Total						kat_kolesterolbaru		Total						kat_hipertensibaru		Total
			Obesitas	Overweight							Hiperkolestrol	Normokolestrol							Hipertensi	Tidak Hipertensi
kat_umur	< = 35 tahun	Count	21	41	62			kat_umur	< = 35 tahun	Count	22	40	62			kat_umur	< = 35 tahun	Count	13	49	62
		% within kat_umur	0.33871	0.66129	1					% within kat_umur	0.354839	0.645161	1					% within kat_umur	0.209677	0.790323	1
	36-60 tahun	Count	47	140	187				36-60 tahun	Count	102	85	187				36-60 tahun	Count	91	96	187
		% within kat_umur	0.251337	0.748663	1					% within kat_umur	0.545455	0.454545	1					% within kat_umur	0.486631	0.513369	1
	> 60 tahun	Count	3	33	36				> 60 tahun	Count	20	16	36				> 60 tahun	Count	28	8	36
		% within kat_umur	0.0833333	0.916667	1					% within kat_umur	0.555556	0.444444	1					% within kat_umur	0.777778	0.222222	1
Total		Count	71	214	285			Total		Count	144	141	285			Total		Count	132	153	285
		% within kat_umur	0.249123	0.750877	1					% within kat_umur	0.505263	0.494737	1					% within kat_umur	0.463158	0.536842	1
Chi-Square Tests								Chi-Square Tests								Chi-Square Tests
	Value	df	Asymptotic Significance (2-sided)						Value	df	Asymptotic Significance (2-sided)						Value	df	Asymptotic Significance (2-sided)
Pearson Chi-Square	7.955a	2	0.0187349					Pearson Chi-Square	7.185a	2	0.0275305					Pearson Chi-Square	30.768a	2	2.0839e-07
Likelihood Ratio	9.08568	2	0.0106431					Likelihood Ratio	7.26319	2	0.026474					Likelihood Ratio	32.6253	2	8.23183e-08
Linear-by-Linear Association	7.39643	1	0.00653534					Linear-by-Linear Association	5.17035	1	0.0229755					Linear-by-Linear Association	30.6474	1	3.09443e-08
N of Valid Cases	285							N of Valid Cases	285							N of Valid Cases	285
a. 0 cells (0.0%) have expected count less than 5. The minimum expected count is 8.97.								a. 0 cells (0.0%) have expected count less than 5. The minimum expected count is 17.81.								a. 0 cells (0.0%) have expected count less than 5. The minimum expected count is 16.67.
VARIABEL NUMERIK
Correlations							Correlations							Correlations						Correlations
			BMI	Kolestrol						BMI	Sistol						Kolestrol	Sistol					BMI	Kolestrol	Sistol
Spearman's rho	BMI	Correlation Coefficient	1	-.123*			Spearman's rho	BMI	Correlation Coefficient	1	-0.0834795			Spearman's rho	Kolestrol	Correlation Coefficient	1	.201**		Spearman's rho	BMI	Correlation Coefficient	1	-.123*	-0.0834795
		Sig. (2-tailed)		0.0374325					Sig. (2-tailed)		0.159856					Sig. (2-tailed)		0.000625176				Sig. (2-tailed)		0.0374325	0.159856
		N	285	285					N	285	285					N	285	285				N	285	285	285
	Kolestrol	Correlation Coefficient	-.123*	1				Sistol	Correlation Coefficient	-0.0834795	1				Sistol	Correlation Coefficient	.201**	1			Kolestrol	Correlation Coefficient	-.123*	1	.201**
		Sig. (2-tailed)	0.0374325						Sig. (2-tailed)	0.159856						Sig. (2-tailed)	0.000625176					Sig. (2-tailed)	0.0374325		0.000625176
		N	285	285					N	285	285					N	285	285				N	285	285	285
*. Correlation is significant at the 0.05 level (2-tailed).														**. Correlation is significant at the 0.01 level (2-tailed).							Sistol	Correlation Coefficient	-0.0834795	.201**	1
																						Sig. (2-tailed)	0.159856	0.000625176
																						N	285	285	285
																				*. Correlation is significant at the 0.05 level (2-tailed).
Jenis Kelamin x NUMERIK																				**. Correlation is significant at the 0.01 level (2-tailed).
Correlations
			JK	BMI	Kolestrol	Sistol
Spearman's rho	JK	Correlation Coefficient	1	0.0970768	.347**	-0.061917
		Sig. (2-tailed)		0.101943	1.73755e-09	0.297558
		N	285	285	285	285
	BMI	Correlation Coefficient	0.0970768	1	-.123*	-0.0834795
		Sig. (2-tailed)	0.101943		0.0374325	0.159856
		N	285	285	285	285
	Kolestrol	Correlation Coefficient	.347**	-.123*	1	.201**
		Sig. (2-tailed)	1.73755e-09	0.0374325		0.000625176
		N	285	285	285	285
	Sistol	Correlation Coefficient	-0.061917	-0.0834795	.201**	1
		Sig. (2-tailed)	0.297558	0.159856	0.000625176
		N	285	285	285	285
**. Correlation is significant at the 0.01 level (2-tailed).
*. Correlation is significant at the 0.05 level (2-tailed).
UMUR x NUMERIK
Correlations
			kat_umur	BMI	Kolestrol	Sistol
Spearman's rho	kat_umur	Correlation Coefficient	1	-.203**	.222**	.408**
		Sig. (2-tailed)		0.000579191	0.000161572	7.47099e-13
		N	285	285	285	285
	BMI	Correlation Coefficient	-.203**	1	-.123*	-0.0834795
		Sig. (2-tailed)	0.000579191		0.0374325	0.159856
		N	285	285	285	285
	Kolestrol	Correlation Coefficient	.222**	-.123*	1	.201**
		Sig. (2-tailed)	0.000161572	0.0374325		0.000625176
		N	285	285	285	285
	Sistol	Correlation Coefficient	.408**	-0.0834795	.201**	1
		Sig. (2-tailed)	7.47099e-13	0.159856	0.000625176
		N	285	285	285	285
**. Correlation is significant at the 0.01 level (2-tailed).
*. Correlation is significant at the 0.05 level (2-tailed).

## Sheet: Multivariat (kategorik)
Variables Entered/Removeda											Variables Entered/Removeda											Variables Entered/Removeda
Model	Variables Entered	Variables Removed	Method								Model	Variables Entered	Variables Removed	Method								Model	Variables Entered	Variables Removed	Method
1	kat_kolesterolbaru, kat_bmibarub		Enter								1	kat_hipertensibaru, kat_bmibaru, kat_kolesterolbarub		Enter								1	kat_hipertensibaru, kat_bmibaru, kat_kolesterolbarub		Enter
a. Dependent Variable: kat_hipertensibaru											a. Dependent Variable: kat_umur											a. Dependent Variable: JK
b. All requested variables entered.											b. All requested variables entered.											b. All requested variables entered.
																						Model Summaryb
Model Summaryb											Model Summaryb											Model	R	R Square	Adjusted R Square	Std. Error of the Estimate
Model	R	R Square	Adjusted R Square	Std. Error of the Estimate							Model	R	R Square	Adjusted R Square	Std. Error of the Estimate							1	.348a	0.120843	0.111457	0.429015
1	.209a	0.0437317	0.0369497	0.490203							1	.361a	0.130612	0.121331	0.543934							a. Predictors: (Constant), kat_hipertensibaru, kat_bmibaru, kat_kolesterolbaru
a. Predictors: (Constant), kat_kolesterolbaru, kat_bmibaru											a. Predictors: (Constant), kat_hipertensibaru, kat_bmibaru, kat_kolesterolbaru											b. Dependent Variable: JK
b. Dependent Variable: kat_hipertensibaru											b. Dependent Variable: kat_umur
																						ANOVAa
ANOVAa											ANOVAa											Model		Sum of Squares	df	Mean Square	F	Sig.
Model		Sum of Squares	df	Mean Square	F	Sig.					Model		Sum of Squares	df	Mean Square	F	Sig.					1	Regression	7.10897	3	2.36966	12.8748	.000b
1	Regression	3.09897	2	1.54948	6.44816	.002b					1	Regression	12.4902	3	4.1634	14.072	.000b						Residual	51.7191	281	0.184054
	Residual	67.7642	282	0.240299								Residual	83.1379	281	0.295864								Total	58.8281	284
	Total	70.8632	284									Total	95.6281	284								a. Dependent Variable: JK
a. Dependent Variable: kat_hipertensibaru											a. Dependent Variable: kat_umur											b. Predictors: (Constant), kat_hipertensibaru, kat_bmibaru, kat_kolesterolbaru
b. Predictors: (Constant), kat_kolesterolbaru, kat_bmibaru											b. Predictors: (Constant), kat_hipertensibaru, kat_bmibaru, kat_kolesterolbaru
Coefficientsa											Coefficientsa											Coefficientsa
Model		Unstandardized Coefficients		Standardized Coefficients	t	Sig.	95,0% Confidence Interval for B				Model		Unstandardized Coefficients		Standardized Coefficients	t	Sig.	95,0% Confidence Interval for B				Model		Unstandardized Coefficients		Standardized Coefficients	t	Sig.	95,0% Confidence Interval for B
		B	Std. Error	Beta			Lower Bound	Upper Bound					B	Std. Error	Beta			Lower Bound	Upper Bound					B	Std. Error	Beta			Lower Bound	Upper Bound
1	(Constant)	0.52569	0.065206		8.06198	2.1538e-14	0.397338	0.654042			1	(Constant)	2.00858	0.0802594		25.0261	1.72126e-73	1.85059	2.16657			1	(Constant)	1.8948	0.0633027		29.9323	2.17773e-89	1.77019	2.0194
	kat_bmibaru	-0.107333	0.0671437	-0.0930976	-1.59856	0.111038	-0.2395	0.0248331				kat_bmibaru	0.176017	0.0748402	0.131424	2.3519	0.0193682	0.0286979	0.323335				kat_bmibaru	-0.119503	0.0590284	-0.113762	-2.02449	0.043865	-0.235697	-0.00330867
	kat_kolesterolbaru	0.185445	0.0580832	0.18594	3.19274	0.00156879	0.0711132	0.299777				kat_kolesterolbaru	-0.0887366	0.0656043	-0.0765911	-1.3526	0.17727	-0.217875	0.0404017				kat_kolesterolbaru	-0.299332	0.0517438	-0.329404	-5.78488	1.93192e-08	-0.401187	-0.197477
a. Dependent Variable: kat_hipertensibaru												kat_hipertensibaru	-0.350333	0.0660764	-0.301578	-5.30195	2.32204e-07	-0.480401	-0.220266				kat_hipertensibaru	0.0964875	0.0521161	0.105898	1.85139	0.065162	-0.00610013	0.199075
											a. Dependent Variable: kat_umur											a. Dependent Variable: JK
Residuals Statisticsa
	Minimum	Maximum	Mean	Std. Deviation	N						Residuals Statisticsa											Residuals Statisticsa
Predicted Value	0.418356	0.711135	0.536842	0.10446	285							Minimum	Maximum	Mean	Std. Deviation	N							Minimum	Maximum	Mean	Std. Deviation	N
Residual	-0.711135	0.581644	-5.06418e-18	0.488473	285						Predicted Value	1.56951	2.1846	1.90877	0.209713	285						Predicted Value	1.47596	1.99128	1.70877	0.158214	285
Std. Predicted Value	-1.13427	1.66851	4.90835e-17	1	285						Residual	-1.1846	1.34175	6.62238e-17	0.541054	285						Residual	-0.991283	0.524039	1.09075e-16	0.426743	285
Std. Residual	-1.4507	1.18654	2.37627e-17	0.996473	285						Std. Predicted Value	-1.61774	1.31525	7.36253e-17	1	285						Std. Predicted Value	-1.4715	1.78563	-2.49703e-16	1	285
a. Dependent Variable: kat_hipertensibaru											Std. Residual	-2.17783	2.46676	1.11801e-16	0.994704	285						Std. Residual	-2.3106	1.22149	1.63612e-16	0.994704	285
											a. Dependent Variable: kat_umur											a. Dependent Variable: JK
											Setelah filter											Setelah filter
											Variables Entered/Removeda
											Model	Variables Entered	Variables Removed	Method								Variables Entered/Removeda
											1	kat_hipertensibaru, kat_bmibarub		Enter								Model	Variables Entered	Variables Removed	Method
											a. Dependent Variable: kat_umur											1	kat_kolesterolbaru, kat_bmibarub		Enter
											b. All requested variables entered.											a. Dependent Variable: JK
																						b. All requested variables entered.
											ANOVA+S93:Y98a
											Model		Sum of Squares	df	Mean Square	F	Sig.					Model Summaryb
											1	Regression	11.9489	2	5.97445	20.134	.000b					Model	R	R Square	Adjusted R Square	Std. Error of the Estimate
												Residual	83.6792	282	0.296735							1	.332a	0.110119	0.103808	0.430858
												Total	95.6281	284								a. Predictors: (Constant), kat_kolesterolbaru, kat_bmibaru
											a. Dependent Variable: kat_umur											b. Dependent Variable: JK
											b. Predictors: (Constant), kat_hipertensibaru, kat_bmibaru
											Model Summaryb
											Model	R	R Square	Adjusted R Square	Std. Error of the Estimate							ANOVAa
											1	.353a	0.124952	0.118746	0.544734							Model		Sum of Squares	df	Mean Square	F	Sig.
											a. Predictors: (Constant), kat_hipertensibaru, kat_bmibaru											1	Regression	6.4781	2	3.23905	17.4482	.000b
											b. Dependent Variable: kat_umur												Residual	52.35	282	0.185638
																							Total	58.8281	284
											Coefficientsa											a. Dependent Variable: JK
											Model		Unstandardized Coefficients		Standardized Coefficients	t	Sig.	95,0% Confidence Interval for B				b. Predictors: (Constant), kat_kolesterolbaru, kat_bmibaru
													B	Std. Error	Beta			Lower Bound	Upper Bound
											1	(Constant)	1.97393	0.0761736		25.9136	1.41885e-76	1.82399	2.12387			Coefficientsa
												kat_bmibaru	0.175628	0.0749497	0.131134	2.34328	0.0198098	0.0280964	0.32316			Model		Unstandardized Coefficients		Standardized Coefficients	t	Sig.	95,0% Confidence Interval for B
												kat_hipertensibaru	-0.367027	0.065009	-0.315948	-5.64579	4.00786e-08	-0.494991	-0.239062					B	Std. Error	Beta			Lower Bound	Upper Bound
											a. Dependent Variable: kat_umur											1	(Constant)	1.94552	0.057312		33.9461	1.32124e-101	1.8327	2.05833
																							kat_bmibaru	-0.129859	0.0590152	-0.123621	-2.20043	0.0285868	-0.246025	-0.0136929
											Residuals Statisticsa												kat_kolesterolbaru	-0.281439	0.0510516	-0.309714	-5.51284	7.97584e-08	-0.381929	-0.180948
												Minimum	Maximum	Mean	Std. Deviation	N						a. Dependent Variable: JK
											Predicted Value	1.60691	2.14956	1.90877	0.205119	285
											Residual	-1.14956	1.39309	-1.55821e-18	0.542812	285						Residuals Statisticsa
											Std. Predicted Value	-1.47167	1.1739	4.10588e-16	1	285							Minimum	Maximum	Mean	Std. Deviation	N
											Std. Residual	-2.11032	2.55739	-6.05753e-17	0.996473	285						Predicted Value	1.53422	1.94552	1.70877	0.15103	285
											a. Dependent Variable: kat_umur											Residual	-0.945518	0.46578	1.19203e-16	0.429338	285
																						Std. Predicted Value	-1.15574	1.56754	-1.62054e-16	1	285
																						Std. Residual	-2.1945	1.08105	-1.51146e-16	0.996473	285
																						a. Dependent Variable: JK

## Sheet: Multivariat (numerik)
Variables Entered/Removeda											Variables Entered/Removeda											Variables Entered/Removeda
Model	Variables Entered	Variables Removed	Method								Model	Variables Entered	Variables Removed	Method								Model	Variables Entered	Variables Removed	Method
1	Kolestrol, BMIb		Enter								1	Sistol, BMI, Kolestrolb		Enter								1	Sistol, BMI, Kolestrolb		Enter
a. Dependent Variable: Sistol											a. Dependent Variable: Umur											a. Dependent Variable: JK
b. All requested variables entered.											b. All requested variables entered.											b. All requested variables entered.
Model Summaryb											Model Summaryb											Model Summaryb
Model	R	R Square	Adjusted R Square	Std. Error of the Estimate							Model	R	R Square	Adjusted R Square	Std. Error of the Estimate							Model	R	R Square	Adjusted R Square	Std. Error of the Estimate
1	.227a	0.0517176	0.0449922	23.2594							1	.535a	0.286202	0.278581	11.5905							1	.368a	0.135206	0.125974	0.425496
a. Predictors: (Constant), Kolestrol, BMI											a. Predictors: (Constant), Sistol, BMI, Kolestrol											a. Predictors: (Constant), Sistol, BMI, Kolestrol
b. Dependent Variable: Sistol											b. Dependent Variable: Umur											b. Dependent Variable: JK
ANOVAa											ANOVAa											ANOVAa
Model		Sum of Squares	df	Mean Square	F	Sig.					Model		Sum of Squares	df	Mean Square	F	Sig.					Model		Sum of Squares	df	Mean Square	F	Sig.
1	Regression	8320.46	2	4160.23	7.68988	.001b					1	Regression	15136	3	5045.33	37.5562	.000b					1	Regression	7.95392	3	2.65131	14.6443	.000b
	Residual	152562	282	541.001								Residual	37749.7	281	134.341								Residual	50.8741	281	0.181047
	Total	160883	284									Total	52885.7	284									Total	58.8281	284
a. Dependent Variable: Sistol											a. Dependent Variable: Umur											a. Dependent Variable: JK
b. Predictors: (Constant), Kolestrol, BMI											b. Predictors: (Constant), Sistol, BMI, Kolestrol											b. Predictors: (Constant), Sistol, BMI, Kolestrol
Coefficientsa											Coefficientsa											Coefficientsa
Model		Unstandardized Coefficients		Standardized Coefficients	t	Sig.	95,0% Confidence Interval for B				Model		Unstandardized Coefficients		Standardized Coefficients	t	Sig.	95,0% Confidence Interval for B				Model		Unstandardized Coefficients		Standardized Coefficients	t	Sig.	95,0% Confidence Interval for B
		B	Std. Error	Beta			Lower Bound	Upper Bound					B	Std. Error	Beta			Lower Bound	Upper Bound					B	Std. Error	Beta			Lower Bound	Upper Bound
1	(Constant)	126.197	12.5516		10.0543	1.59045e-20	101.491	150.904			1	(Constant)	18.7539	7.29003		2.57254	0.0106093	4.40387	33.1039			1	(Constant)	0.981638	0.267622		3.66801	0.000292339	0.454841	1.50844
	BMI	-0.250149	0.367129	-0.0396973	-0.681366	0.496199	-0.972811	0.472512				BMI	-0.559652	0.183097	-0.154905	-3.05659	0.00245413	-0.920067	-0.199236				BMI	0.0138047	0.0067216	0.114564	2.05378	0.0409222	0.000573607	0.0270358
	Kolestrol	0.101307	0.0268137	0.220122	3.77818	0.000192742	0.0485267	0.154088				Kolestrol	0.047344	0.0136957	0.179421	3.45685	0.000631093	0.0203848	0.0743032				Kolestrol	0.00320629	0.000502778	0.364324	6.37715	7.39052e-10	0.0022166	0.00419598
a. Dependent Variable: Sistol												Sistol	0.244779	0.0296743	0.426933	8.24886	6.23384e-15	0.186367	0.303191				Sistol	-0.0024704	0.00108936	-0.12919	-2.26775	0.0241037	-0.00461475	-0.000326056
											a. Dependent Variable: Umur											a. Dependent Variable: JK
Residuals Statisticsa
	Minimum	Maximum	Mean	Std. Deviation	N						Residuals Statisticsa											Residuals Statisticsa
Predicted Value	129.33	158.548	140.326	5.41271	285							Minimum	Maximum	Mean	Std. Deviation	N							Minimum	Maximum	Mean	Std. Deviation	N
Residual	-53.2913	67.7754	7.18022e-15	23.1774	285						Predicted Value	31.3861	65.6071	46.9333	7.30039	285						Predicted Value	1.34599	2.29802	1.70877	0.167352	285
Std. Predicted Value	-2.03155	3.36644	-1.25523e-15	1	285						Residual	-28.4749	44.898	3.14135e-15	11.5292	285						Residual	-0.943975	0.604418	-2.55546e-16	0.423243	285
Std. Residual	-2.29117	2.91389	3.78644e-16	0.996473	285						Std. Predicted Value	-2.12964	2.55791	3.13589e-17	1	285						Std. Predicted Value	-2.1678	3.52098	1.61469e-15	1	285
a. Dependent Variable: Sistol											Std. Residual	-2.45674	3.87368	2.61146e-16	0.994704	285						Std. Residual	-2.21853	1.4205	-6.80937e-16	0.994704	285
											a. Dependent Variable: Umur											a. Dependent Variable: JK
